# Supplementary material
Source: PubMed Central journal article supplement (PMC4482769)

Author

Year

Changes in BMI z-score (95% CI)

**Period C: From Diagnosis to Start of Maintenance**

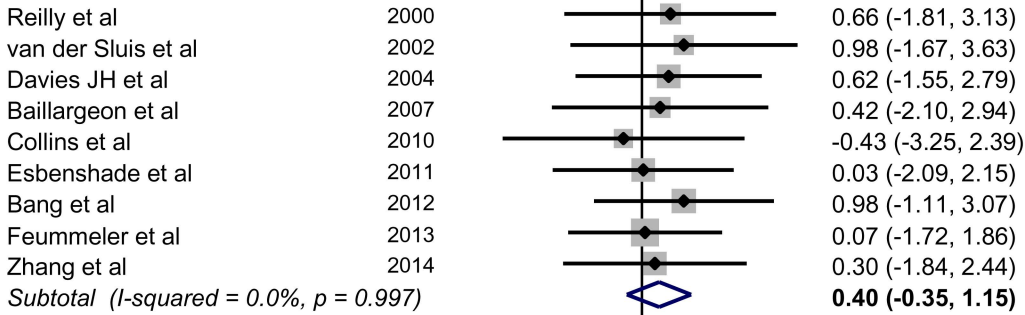

**Period D: From Start of Maintenance to End of Treatment**

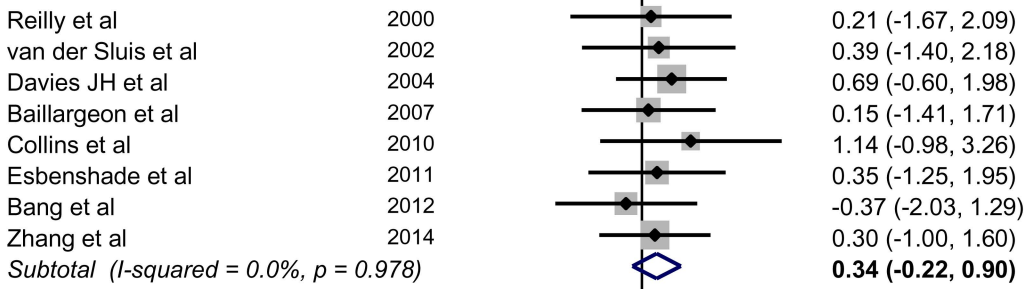

**Period E: From Diagnosis to End of Treatment**

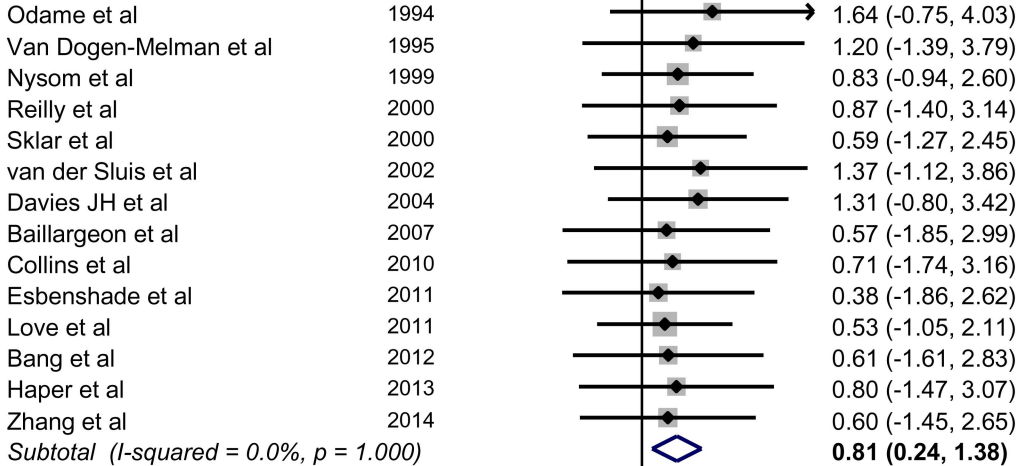

NOTE: Weights are from random effects analysis

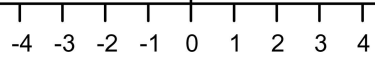

Author

Year

BMI z-score (95% CI)

**Period F: From Diagnosis to <2 Years Post Treatment**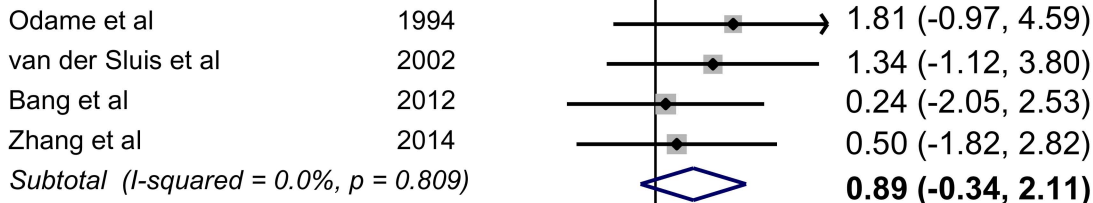**Period G: From Diagnosis to 2-4.9 Years Post Treatment**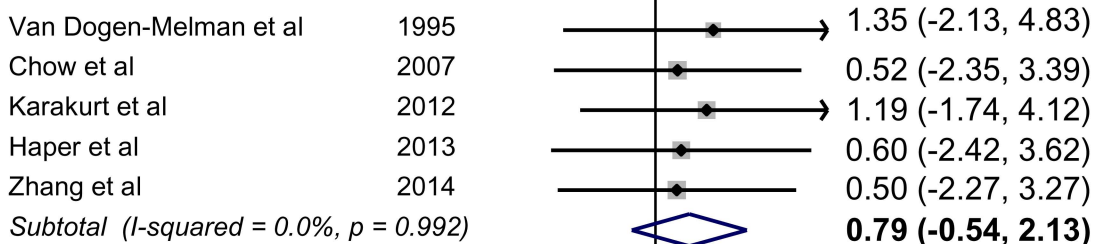**Period H: From Diagnosis to ≥ 5 Years Post Treatment**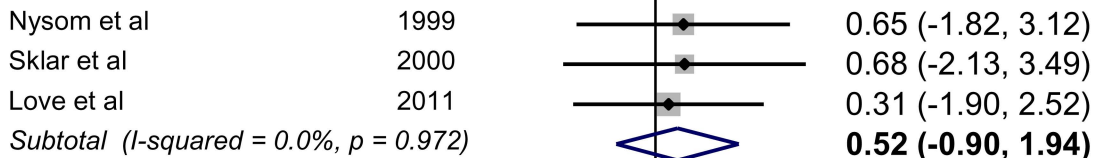

NOTE: Weights are from random effects analysis

-4 -3 -2 -1 0 1 2 3 4

# Changes in BMI Z-score

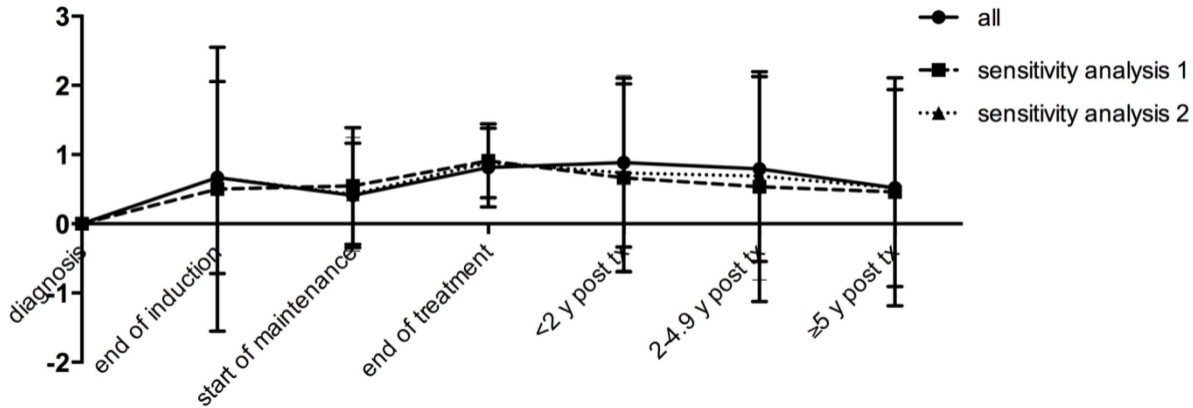

Supplement: NIHMS669375-supplement-Supp_FigureS1-S3.pdf [file NIHMS669375-supplement-Supp_FigureS1-S3.pdf]
